# Supplementary material for: A serum metabolomic fingerprint of bevacizumab and temsirolimus combination as first-line treatment of metastatic renal cell carcinoma
Source: PubMed Central journal article supplement — Br J Cancer. 2015 Sep 15;113(8):1148–57. doi: 10.1038/bjc.2015.322 (PMC4647878; doi:10.1038/bjc.2015.322), 2015-09-15
Supplement: bjc2015322x1.pdf [file bjc2015322x1.pdf]

## **A Serum Metabolomic Fingerprint of Bevacizumab and Temsirolimus Combination as First-Line Treatment of Metastatic Renal Cell Carcinoma**

Elodie Jobard<sup>a, b</sup>, Ellen Blanc<sup>b</sup>, Sylvie Négrier<sup>b</sup>, Bernard Escudier<sup>c</sup>, Gwenaelle Gravis<sup>d</sup>,  
Christine Chevreau<sup>e</sup>, Bénédicte Elena-Herrmann<sup>a\*</sup> and Olivier Trédan<sup>b\*</sup>.

This document contains:

- **Supplementary Figure 1:** Representative 800 MHz <sup>1</sup>H CPMG spectrum and <sup>1</sup>H -<sup>13</sup>C NMR HSQC spectrum of blood serum for a mRCC cancer patient.
- **Supplementary Table 1:** Metabolites identified by NMR in blood sera from TORAVA patients.
- **Supplementary Figure 2:** O-PLS Model validations by re-sampling 1000 times the model under the null hypothesis,
- **Supplementary Figure 3:** Sensitivity analysis of O-PLS discrimination between W0 and W2 for the experimental arm A
- **Supplementary Table 2:** Goodness-of-fit model parameters for PLS models discriminating the histoprognosis features of tumours according to the treatment and collection time of serum samples.
- **Supplementary Table 3:** Goodness-of-fit model parameters for O-PLS models discriminating the experimental arm and the two standard therapies according to collection time of serum samples.
- **Supplementary Figure 4:** O-PLS loadings plot after univariate analysis at W5-6 between arms A and B.

A

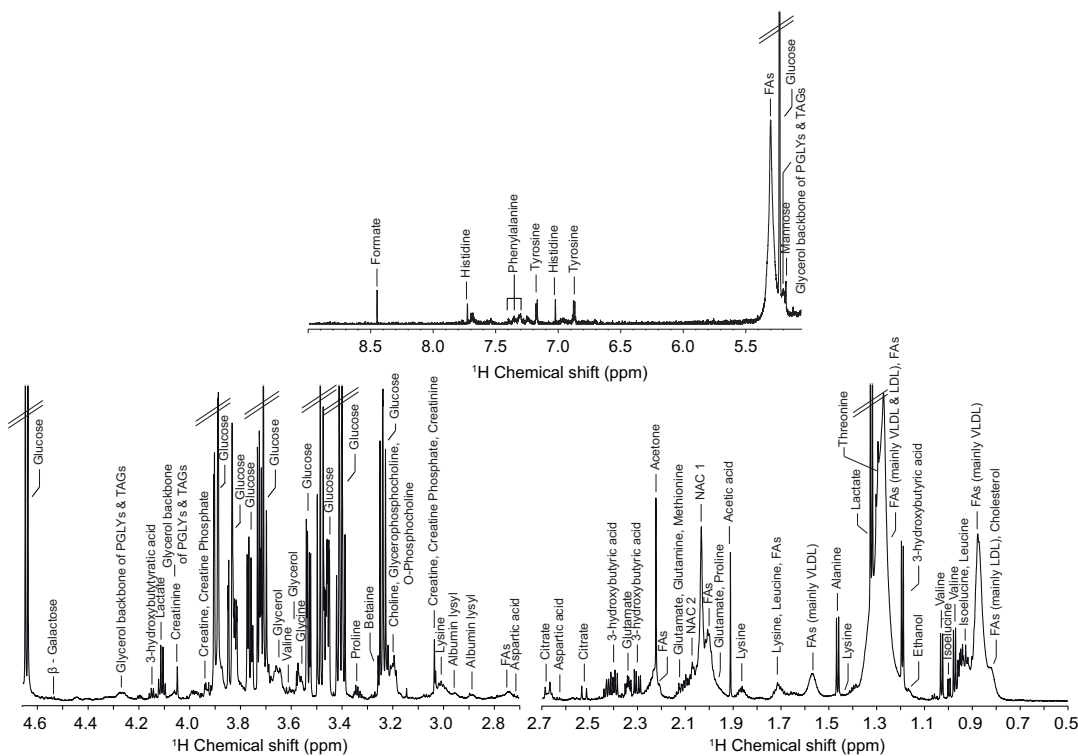

B

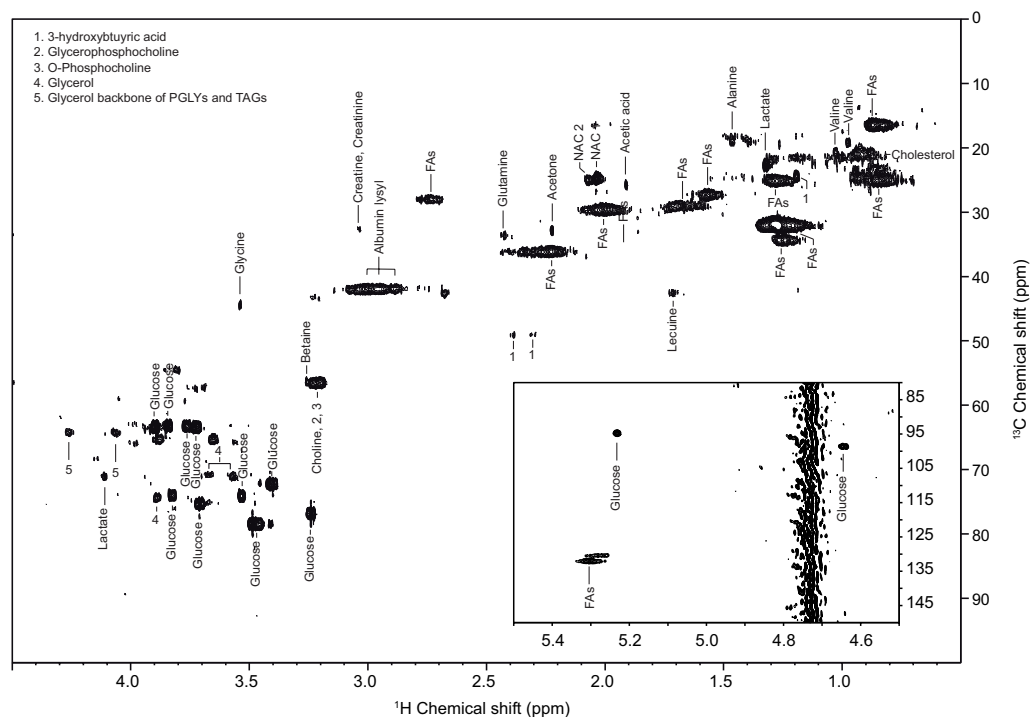

**Supplementary Figure 1:** Representative <sup>1</sup>H CPMG spectrum (A) and a <sup>1</sup>H -<sup>13</sup>C NMR HSQC spectrum (B) at 800 MHz for a mRCC cancer patient treated with the temsirolimus and bevacizumab combination.

**Supplementary Table 1:** Metabolites identified from 800 MHz 1D and 2D NMR profiles of blood sera from patients of the TORAVA trial.

| ID   | Name                     | $\delta^1\text{H}$<br>(ppm) | $\delta^{13}\text{C}$<br>(ppm) | Multiplicity            | Moieties                                                | Observed                |
|------|--------------------------|-----------------------------|--------------------------------|-------------------------|---------------------------------------------------------|-------------------------|
| 1    | 1-methylhistidine        | 7.04                        |                                | s                       | <b>H4</b>                                               | JRes, TOCSY             |
|      |                          | 7.76                        |                                | s                       | <b>H2</b>                                               | CPMG, JRes, TOCSY       |
| 2    | 3-hydroxybutyric acid    | 1.19                        | 24.7                           | d                       | $\gamma\text{CH}_3$                                     | CPMG, JRes, TOCSY, HSQC |
|      |                          | 2.30                        | 49.1                           | q                       | half $\alpha\text{CH}_2$                                | CPMG, JRes, TOCSY, HSQC |
|      |                          | 2.40                        | 49.1                           | q                       | half $\alpha\text{CH}_2$                                | CPMG, JRes, TOCSY, HSQC |
|      |                          | 4.13                        |                                | m                       | $\beta\text{CH}$                                        | JRes, TOCSY             |
| 3    | 3-hydrophenylacetic acid | 6.86                        |                                | m                       |                                                         | CPMG, TOCSY             |
|      |                          | 7.24                        |                                | t                       |                                                         | CPMG, TOCSY             |
| 4    | Acetic acid              | 1.91                        | 25.7                           | s                       | <b>CH<sub>3</sub></b>                                   | CPMG, JRes, TOCSY, HSQC |
| 5    | Acetaoacetic acid        | 2.27                        |                                | s                       | <b>CH<sub>3</sub></b>                                   | CPMG, JRes              |
|      |                          | 3.43                        |                                | s                       | $\alpha\text{CH}_2$                                     | CPMG, JRes              |
| 6    | Acetone                  | 2.22                        | 32.9                           | s                       | <b>CH<sub>3</sub></b>                                   | CPMG, JRes, TOCSY, HSQC |
| 7    | Alanine                  | 1.46                        | 19.3                           | d                       | $\beta\text{CH}_3$                                      | CPMG, JRes, TOCSY, HSQC |
|      |                          | 3.76                        |                                | q                       | $\alpha\text{CH}$                                       | CPMG, JRes, TOCSY       |
| 8    | Albumin Lysyl            | 2.89                        |                                | t                       | $\epsilon\text{CH}_2$                                   | CPMG, TOCSY, JRes       |
|      |                          | 2.96                        | 41.9                           | t                       | $\epsilon\text{CH}_2$                                   | CPMG, TOCSY, HSQC       |
|      |                          | 3.01                        | 41.9                           | t                       | $\epsilon\text{CH}_2$                                   | CPMG, TOCSY, HSQC       |
| 9    | Aspartic Acid            | 2.68                        |                                | dd                      | half $\beta\text{CH}_2$                                 | JRes, TOCSY             |
|      |                          | 2.80                        |                                | dd                      | half $\beta\text{CH}_2$                                 | JRes, TOCSY             |
|      |                          | 3.89                        |                                | dd                      | $\alpha\text{CH}$                                       | JRes, TOCSY             |
| 10   | Betaine                  | 3.26                        | 56.3                           | s                       | <b>CH<sub>3</sub></b>                                   | CPMG, JRes, TOCSY, HSQC |
| 11   | Cholesterol              | 0.66                        | 14.3                           | m                       | <b>C(18)H<sub>3</sub></b> (in HDL)                      | CPMG, TOCSY             |
|      |                          | 0.70                        |                                |                         | <b>C(18)H<sub>3</sub></b> (in VLDL)                     | CPMG, TOCSY             |
|      |                          | 0.82                        | 25.1                           | m                       | <b>C(26)H<sub>3</sub></b> and <b>C(27)H<sub>3</sub></b> | CPMG, TOCSY, HSQC       |
|      |                          | 0.91                        | 21.1                           | d                       | <b>C(21)H<sub>3</sub></b>                               | CPMG, JRes, HSQC        |
|      |                          | 1.01                        |                                | s                       | <b>C(19)H<sub>3</sub></b>                               | CPMG                    |
| 1.11 |                          | m                           |                                | CPMG                    |                                                         |                         |
| 12   | Choline                  | 3.19                        | 56.8                           | s                       | <b>N(CH<sub>3</sub>)<sub>3</sub></b>                    | CPMG, JRes, TOCSY       |
| 13   | Glycerophosphocholine    | 3.22                        | 56.5                           | s                       | <b>N(CH<sub>3</sub>)<sub>3</sub></b>                    | CPMG, JRes, HSQC        |
|      |                          | 3.62                        |                                | m                       | $\beta\text{CH}_2$                                      | CPMG, JRes              |
|      |                          | 3.67                        |                                | m                       | <b>NCH<sub>2</sub></b>                                  | CPMG, JRes              |
|      |                          | 4.29                        | 64                             | m                       | $\alpha\text{CH}_2$                                     | JRes, HSQC              |
| 14   | O-Phosphocholine         | 3.20                        | 56.5                           | s                       | <b>N(CH<sub>3</sub>)<sub>3</sub></b>                    | CPMG, TOCSY, JRes       |
|      |                          | 3.58                        |                                | m                       | $\beta\text{CH}_2$                                      | CPMG, JRes              |
| 15   | Citrate                  | 2.52                        |                                | d                       | half <b>CH<sub>2</sub></b>                              | CPMG, JRes, TOCSY       |
|      |                          | 2.67                        |                                | d                       | half <b>CH<sub>2</sub></b>                              | CPMG, JRes, TOCSY       |
| 16   | Creatine                 | 3.03                        | 32.6                           | s                       | <b>CH<sub>3</sub></b>                                   | CPMG, JRes, TOCSY, HSQC |
|      |                          | 3.93                        |                                | s                       | <b>CH<sub>2</sub></b>                                   | CPMG, JRes, TOCSY, HSQC |
| 17   | Creatine Phosphate       | 3.03                        | 32.6                           | s                       | <b>CH<sub>3</sub></b>                                   | CPMG, JRes, TOCSY, HSQC |
|      |                          | 3.93                        |                                | s                       | <b>CH<sub>2</sub></b>                                   | CPMG, JRes, TOCSY       |
| 18   | Creatinine               | 3.04                        | 32.6                           | s                       | <b>CH<sub>3</sub></b>                                   | CPMG, JRes, TOCSY, HSQC |
|      |                          | 4.05                        |                                | s                       | <b>CH<sub>2</sub></b>                                   | CPMG, JRes, TOCSY, HSQC |
| 19   | Ethanol                  | 1.17                        |                                | t                       | <b>CH<sub>3</sub></b>                                   | CPMG, JRes, TOCSY       |
| 20   | Formate                  | 8.45                        |                                | s                       | <b>CH</b>                                               | CPMG, JRes, TOCSY       |
| 21   | $\beta$ Galactose        | 4.53                        |                                | d                       | <b>H1</b>                                               | JRes                    |
| 22a  | $\alpha$ -Glucose        | 3.42                        | 72.2                           | q                       | <b>H4</b>                                               | CPMG, JRes, TOCSY, HSQC |
|      |                          | 3.53                        | 74                             | dd                      | <b>H2</b>                                               | CPMG, JRes, TOCSY, HSQC |
|      |                          | 3.71                        | 75.3                           | t                       | <b>H3</b>                                               | CPMG, JRes, TOCSY, HSQC |
|      |                          | 3.72                        | 63.4                           | dd                      | half <b>C(6)H<sub>2</sub></b>                           | CPMG, JRes, TOCSY, HSQC |
|      |                          | 3.76                        | 63.4                           | m                       | half <b>C(6)H<sub>2</sub></b>                           | CPMG, JRes, TOCSY, HSQC |
|      |                          | 3.83                        | 74                             | ddd                     | <b>H5</b>                                               | CPMG, JRes, TOCSY, HSQC |
|      |                          | 3.84                        | 63.2                           | m                       | half <b>C(6)H<sub>2</sub></b>                           | CPMG, JRes, TOCSY, HSQC |
| 5.23 | 94.6                     | d                           | <b>H1</b>                      | CPMG, JRes, TOCSY, HSQC |                                                         |                         |

|      |                                              |      |                                        |                   |                                                                       |                         |
|------|----------------------------------------------|------|----------------------------------------|-------------------|-----------------------------------------------------------------------|-------------------------|
| 22b  | $\beta$ Glucose                              | 3.24 | 76.8                                   | dd                | <b>H2</b>                                                             | CPMG, JRes, TOCSY, HSQC |
|      |                                              | 3.40 | 72.2                                   | q                 | <b>H4</b>                                                             | CPMG, JRes, TOCSY, HSQC |
|      |                                              | 3.46 | 78.4                                   | t                 | <b>H5</b>                                                             | CPMG, JRes, TOCSY, HSQC |
|      |                                              | 3.48 | 78.3                                   | t                 | <b>H3</b>                                                             | CPMG, JRes, TOCSY, HSQC |
|      |                                              | 3.89 | 63.4                                   | dd                | half <b>C(6)H<sub>2</sub></b>                                         | CPMG, JRes, TOCSY, HSQC |
|      |                                              | 4.64 | 98.6                                   | d                 | <b>H1</b>                                                             | CPMG, JRes, TOCSY, HSQC |
| 23   | Glutamate                                    | 2.04 |                                        | m                 | half $\beta$ <b>CH<sub>2</sub></b>                                    | CPMG, JRes, TOCSY       |
|      |                                              | 2.11 |                                        | m                 | half $\beta$ <b>CH<sub>2</sub></b>                                    | CPMG, JRes, TOCSY       |
|      |                                              | 2.34 |                                        | m                 | half $\gamma$ <b>CH<sub>2</sub></b>                                   | CPMG, JRes, TOCSY       |
|      |                                              | 3.72 |                                        | m                 | $\alpha$ <b>CH</b>                                                    | JRes, TOCSY             |
| 24   | Glutamine                                    | 2.11 |                                        | m                 | half $\beta$ <b>CH<sub>2</sub></b>                                    | CPMG, JRes, TOCSY       |
|      |                                              | 2.46 | 33.9                                   | m                 | half $\gamma$ <b>CH<sub>2</sub></b>                                   | JRes, TOCSY, HSQC       |
|      |                                              | 3.67 |                                        | t                 | $\alpha$ <b>CH<sub>2</sub></b>                                        | JRes, TOCSY             |
| 25   | Glycerol                                     | 3.56 | 65.9                                   | dd                | half <b>CH<sub>2</sub></b>                                            | CPMG, JRes, TOCSY, HSQC |
|      |                                              | 3.65 | 65.3                                   | dd                | half <b>CH<sub>2</sub></b>                                            | CPMG, JRes, TOCSY, HSQC |
|      |                                              | 3.88 | 74.2                                   | dd                | <b>C(2)H</b>                                                          | CPMG, JRes, TOCSY, HSQC |
| 26   | Glycerol backbone<br>of<br>PGLYs* and TAGs** | 4.06 | 64.2                                   | m                 | <b>CH<sub>2</sub>OCOR</b>                                             | CPMG, JRes, TOCSY, HSQC |
|      |                                              | 4.25 | 64.2                                   | m                 | <b>CH<sub>2</sub>OCOR</b>                                             | CPMG, JRes, TOCSY, HSQC |
|      |                                              | 5.20 |                                        | m                 | $\beta$ <b>CHOCOR</b>                                                 | CPMG, JRes, TOCSY       |
| 27   | Glycine                                      | 3.55 | 44.3                                   | s                 | <b>CH<sub>2</sub></b>                                                 | CPMG, JRes, TOCSY, HSQC |
| 28   | NAC*** 1                                     | 2.04 | 24.8                                   | s                 | NHCO <b>CH<sub>3</sub></b>                                            | CPMG, JRes, TOCSY, HSQC |
| 29   | NAC*** 2                                     | 2.07 | 24.9                                   | s                 | NHCO <b>CH<sub>3</sub></b>                                            | CPMG, JRes, TOCSY, HSQC |
| 30   | Histidine                                    | 3.16 |                                        | dd                | half $\beta$ <b>CH<sub>2</sub></b>                                    | CPMG, JRes, TOCSY       |
|      |                                              | 3.98 |                                        | dd                | $\alpha$ <b>CH</b>                                                    | JRes                    |
|      |                                              | 7.03 |                                        | s                 | <b>H4</b>                                                             | CPMG, JRes, TOCSY       |
|      |                                              | 7.73 |                                        | s                 | <b>H2</b>                                                             | CPMG, JRes, TOCSY       |
| 31   | Isoleucine                                   | 0.93 |                                        | t                 | $\delta$ <b>CH<sub>3</sub></b>                                        | CPMG, JRes, TOCSY       |
|      |                                              | 1.00 |                                        | d                 | $\beta$ <b>CH<sub>3</sub></b>                                         | CPMG, JRes, TOCSY       |
|      |                                              | 1.28 |                                        | m                 | $\alpha, \gamma$ <b>CH<sub>2</sub></b>                                | JRes                    |
|      |                                              | 1.46 |                                        | m                 | half $\gamma$ <b>CH<sub>2</sub></b>                                   | JRes, TOCSY             |
|      |                                              | 1.95 |                                        | m                 | $\beta$ <b>CH</b>                                                     | JRes, TOCSY             |
| 32   | Isopropyl alcohol                            | 1.16 |                                        | d                 | <b>CH<sub>3</sub></b>                                                 | CPMG, JRes, TOCSY       |
| 33   | Lactate                                      | 1.32 | 25.7                                   | d                 | <b>CH<sub>3</sub></b>                                                 | CPMG, JRes, TOCSY, HSQC |
|      |                                              | 4.10 | 71.1                                   | q                 | <b>CH</b>                                                             | CPMG, JRes, TOCSY, HSQC |
| 34   | Leucine                                      | 0.94 |                                        | d                 | $\delta$ <b>CH<sub>3</sub></b>                                        | CPMG, JRes, TOCSY       |
|      |                                              | 0.95 |                                        | d                 | $\delta$ <b>CH<sub>3</sub></b>                                        | CPMG, JRes, TOCSY       |
|      |                                              | 1.71 | 42.7                                   | m                 | $\beta$ <b>CH<sub>2</sub>, <math>\gamma</math>CH</b>                  | CPMG, JRes, TOCSY, HSQC |
|      |                                              | 3.69 |                                        | dd                | $\alpha$ <b>CH</b>                                                    | JRes, TOCSY             |
| 35   | Fatty acids (mainly LDL)                     | 0.84 | 16.5                                   | t                 | <b>CH<sub>3</sub>(CH<sub>2</sub>)<sub>n</sub></b>                     | CPMG, JRes, TOCSY, HSQC |
|      |                                              | 1.23 | 34.5                                   | m                 | <b>(CH<sub>2</sub>)<sub>n</sub></b>                                   | CPMG, JRes, TOCSY, HSQC |
| 36   | Fatty acids (mainly VLDL)                    | 0.86 | 23.4                                   | t                 | <b>CH<sub>3</sub>CH<sub>2</sub>CH<sub>2</sub>C=</b>                   | CPMG, JRes, TOCSY, HSQC |
|      |                                              | 1.28 | 25.4                                   | m                 | <b>CH<sub>2</sub>CH<sub>2</sub>CH<sub>2</sub>CO</b>                   | CPMG, TOCSY, HSQC       |
|      |                                              | 1.56 | 27.3                                   | m                 | <b>CH<sub>2</sub>CH<sub>2</sub>CO</b>                                 | CPMG, TOCSY, HSQC       |
| 37   | Fatty acids                                  | 0.93 | 24.8                                   | m                 | <b>CH<sub>3</sub>CH<sub>2</sub></b>                                   | CPMG, JRes, HSQC        |
|      |                                              | 1.22 | 34.3                                   | m                 | CH <sub>3</sub> CH <sub>2</sub> <b>CH<sub>2</sub></b>                 | CPMG, JRes, HSQC        |
|      |                                              | 1.27 | 25.2                                   | m                 | CH <sub>3</sub> <b>CH<sub>2</sub></b> (CH <sub>2</sub> ) <sub>n</sub> | CPMG, JRes, HSQC        |
|      |                                              | 1.30 | 25.4                                   | m                 | <b>CH<sub>2</sub></b>                                                 | CPMG, JRes, TOCSY, HSQC |
|      |                                              | 1.32 |                                        | m                 | <b>CH<sub>2</sub>CH<sub>2</sub>CH<sub>2</sub>CO</b>                   | CPMG, JRes, TOCSY       |
|      |                                              | 1.69 | 28.9                                   | m                 | <b>CH<sub>2</sub>CH<sub>2</sub>C=C</b>                                | CPMG, JRes, HSQC        |
|      |                                              | 2.0  | 29.5                                   | m                 | (CH <sub>2</sub> ) <sub>n</sub> <b>CH<sub>2</sub>CH=</b>              | CPMG, JRes, TOCSY, HSQC |
|      |                                              | 2.23 | 36.2                                   | m                 | CH <sub>2</sub> <b>CH<sub>2</sub>COOC</b>                             | CPMG, JRes, TOCSY, HSQC |
|      |                                              | 2.74 | 28                                     | m                 | C=C <b>CH<sub>2</sub>C=C</b>                                          | CPMG, JRes, TOCSY, HSQC |
|      |                                              | 5.23 |                                        | m                 | <b>CH=CHCH<sub>2</sub>CH=CH</b>                                       | CPMG, TOCSY             |
|      |                                              | 5.26 | 130.1                                  | m                 | <b>CH=CHCH<sub>2</sub>CH=CH</b>                                       | CPMG, TOCSY, HSQC       |
|      |                                              | 5.27 |                                        | m                 | <b>=CHCH<sub>2</sub>CH<sub>2</sub></b>                                | CPMG, TOCSY             |
|      |                                              | 5.29 | 131.7                                  | m                 | <b>CH=CHCH<sub>2</sub>CH=CH</b>                                       | CPMG, JRes, TOCSY, HSQC |
| 5.31 |                                              | m    | <b>=CHCH<sub>2</sub>CH<sub>2</sub></b> | CPMG, TOCSY       |                                                                       |                         |
| 5.33 |                                              | m    | <b>=CHCH<sub>2</sub>CH<sub>2</sub></b> | CPMG, JRes, TOCSY |                                                                       |                         |
| 38   | Lysine                                       | 1.48 |                                        | m                 | $\gamma$ <b>CH<sub>2</sub></b>                                        | CPMG, JRes, TOCSY       |
|      |                                              | 1.69 |                                        | m                 | $\delta$ <b>CH<sub>2</sub></b>                                        | CPMG, TOCSY             |

|           |                      |      |      |    |                                       |                         |
|-----------|----------------------|------|------|----|---------------------------------------|-------------------------|
|           |                      | 1.89 |      | m  | $\beta\text{CH}_2$                    | CPMG, JRes              |
|           |                      | 3.02 |      | m  | $\varepsilon\text{CH}_2$              | CPMG                    |
| <b>39</b> | <b>Mannose</b>       | 5.18 |      | d  | <b>CHOH</b>                           | CPMG, JRes, TOCSY       |
| <b>40</b> | <b>Methanol</b>      | 3.34 |      | s  | <b>OCH<sub>3</sub></b>                | CPMG, JRes, TOCSY       |
| <b>41</b> | <b>Methionine</b>    | 2.13 |      | s  | <b>SCH<sub>3</sub></b>                | JRes, TOCSY             |
| <b>42</b> | <b>Phenylalanine</b> | 3.25 |      | dd | half $\beta\text{CH}_2$               | JRes                    |
|           |                      | 3.97 |      | dd | $\alpha\text{CH}$                     | JRes                    |
|           |                      | 7.30 |      | m  | <b>H2, H6</b>                         | CPMG, TOCSY             |
|           |                      | 7.34 |      | m  | <b>H4</b>                             | CPMG, TOCSY             |
|           |                      | 7.40 |      | m  | <b>H3, H5</b>                         | CPMG, TOCSY             |
| <b>43</b> | <b>Proline</b>       | 2.00 |      | m  | $\gamma\text{CH}_2$                   | JRes                    |
|           |                      | 2.06 |      | m  | half $\beta\text{CH}_2$               | JRes                    |
|           |                      | 2.36 |      | m  | half $\beta\text{CH}_2$               | JRes                    |
|           |                      | 3.35 |      | m  | half $\gamma\text{CH}_2$              | CPMG, JRes              |
|           |                      | 4.12 |      | m  | $\alpha\text{CH}$                     | JRes                    |
| <b>44</b> | <b>Pyruvate</b>      | 2.36 |      | s  | <b>CH<sub>2</sub></b>                 | CPMG, JRes, TOCSY       |
| <b>45</b> | <b>Succinate</b>     | 2.40 |      | s  | $\alpha,\beta\text{CH}_2$             | Jres, TOCSY             |
| <b>46</b> | <b>Threonine</b>     | 1.31 |      | d  | $\gamma\text{CH}_3$                   | JRes                    |
|           |                      | 3.48 |      | dd | $\alpha\text{CH}$                     | JRes                    |
|           |                      | 3.57 |      | d  | $\alpha\text{CH}$                     | CPMG, JRes              |
|           |                      | 4.24 |      | m  | $\beta\text{CH}$                      | JRes                    |
| <b>47</b> | <b>Tyrosine</b>      | 6.87 |      | d  | <b>H3, H5</b>                         | CPMG, JRes, TOCSY       |
|           |                      | 7.18 |      | d  | <b>H2, H6</b>                         | CPMG, JRes, TOCSY       |
| <b>48</b> | <b>Valine</b>        | 0.97 | 19.2 | d  | <b>CH<sub>3</sub></b>                 | CPMG, JRes, TOCSY, HSQC |
|           |                      | 1.03 | 20.7 | d  | <b>CH<sub>3</sub></b>                 | CPMG, JRes, TOCSY, HSQC |
|           |                      | 2.26 |      | m  | $\beta\text{CH}$                      | JRes, TOCSY             |
|           |                      | 3.60 |      | d  | $\alpha\text{CH}$                     | CPMG, JRes, TOCSY       |
| <b>49</b> | <b>Urea</b>          | 5.78 |      | s  | <b>CO(NH<sub>2</sub>)<sub>2</sub></b> | CPMG, TOCSY             |

PGLYs\*: Phosphoglycerides

TAGs\*\*: Triacylglycerides

NAC\*\*\*: N-acetyl-glycoprotein

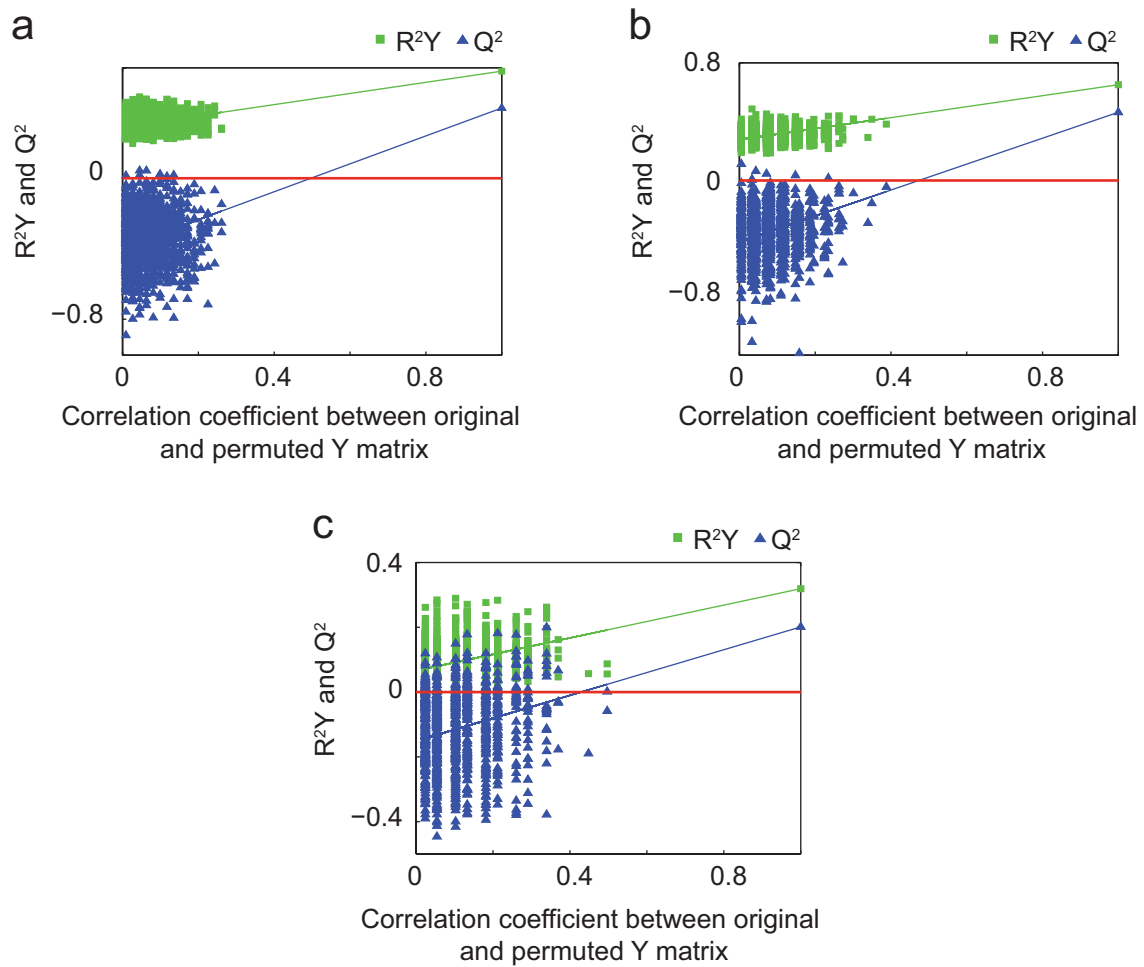

**Supplementary Figure 2:** O-PLS Model validations by re-sampling 1000 times the model under the null hypothesis. a) OPLS model for the arm A, discriminating W0 versus W2. b) OPLS model for the arm A, discriminating W0 versus W5-6. c) OPLS model for the arm C, discriminating W0 versus W5-6.

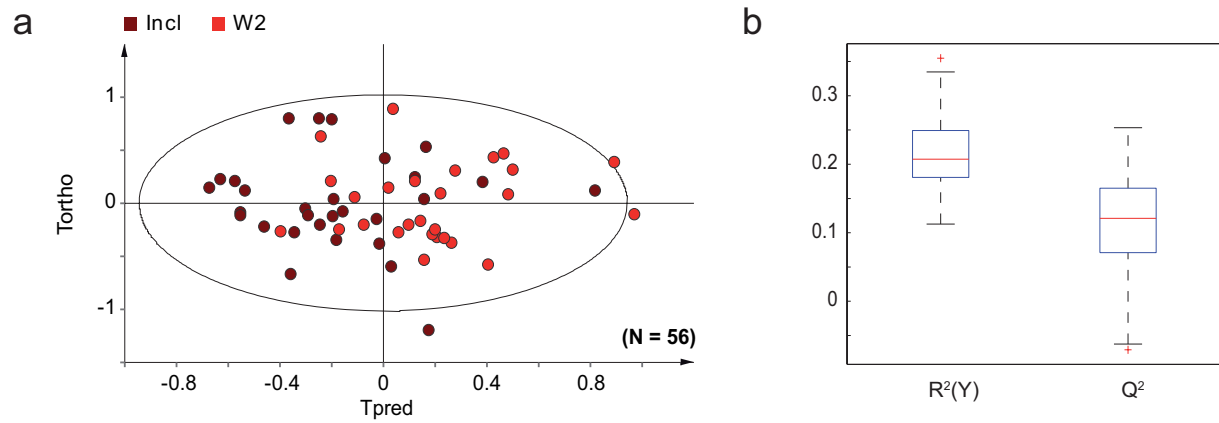

**Supplementary Figure 3:** Sensitivity analysis of O-PLS discrimination between W0 and W2 for the experimental arm A. a) Example of O-PLS model score plot (1+1 components) discriminating W0 vs. W2 for the experimental arm with  $N = 56$ ,  $R^2X = 0.888$ ,  $R^2Y = 0.256$  and  $Q^2 = 0.163$ ; b) Boxplots of  $R^2Y$  and  $Q^2$  values obtained for 1,000 O-PLS models (1+1 components) build from random selection of sub-groups of 56 samples (W0:  $n=28$ ; W2:  $n=28$ ) from arm A. Boxplots describe the 25th and 75th percentiles (blue), the median (red), the whiskers extend to the most extreme data points not considered outliers, and outliers are plotted individually.

**Supplementary Table 2:** Goodness-of-fit model parameters for PLS models discriminating the histoprognosis features of tumours, stratified by treatment (A, B & C) and collection time of serum samples (W0, W2 & W5-6).

|                                      | PLS Model                                                                           | Treatment A<br>(Temsirolimus + Bevacizumab) |                   |                  |                  |                | Treatment B<br>(Sunitinib) |                   |                  |                  |                | Treatment C<br>(Interferon-alpha + Bevacizumab) |                   |                  |                  |                |
|--------------------------------------|-------------------------------------------------------------------------------------|---------------------------------------------|-------------------|------------------|------------------|----------------|----------------------------|-------------------|------------------|------------------|----------------|-------------------------------------------------|-------------------|------------------|------------------|----------------|
|                                      |                                                                                     | Nb. of samples                              | Nb. of components | R <sup>2</sup> X | R <sup>2</sup> Y | Q <sup>2</sup> | Nb. of samples             | Nb. of components | R <sup>2</sup> X | R <sup>2</sup> Y | Q <sup>2</sup> | Nb. of samples                                  | Nb. of components | R <sup>2</sup> X | R <sup>2</sup> Y | Q <sup>2</sup> |
| W0                                   | <b>Tumor Type</b>                                                                   | 56                                          | 2                 | 0.915            | 0.045            | -0.029         | 26                         | 2                 | 0.867            | 0.105            | -0.127         | /                                               | /                 | /                | /                | /              |
|                                      | <b>Grade Furhman (I &amp; II vs. III &amp; IV)</b>                                  | 43                                          | 2                 | 0.913            | 0.086            | -0.113         | 24                         | 2                 | 0.913            | 0.184            | -0.132         | 27                                              | 2                 | 0.905            | 0.0579           | -0.196         |
|                                      | <b>Interval bewteen diagnosis &amp; metastasis (≤ 12 months vs. &gt; 12 months)</b> | 56                                          | 2                 | 0.922            | 0.024            | -0.067         | 25                         | 2                 | 0.91             | 0.353            | 0.161          | 30                                              | 2                 | 0.85             | 0.261            | -0.21          |
|                                      | <b>PS ( 0 or 1 vs. 2)</b>                                                           | 56                                          | 2                 | 0.926            | 0.137            | -0.116         | /                          | /                 | /                | /                | /              | /                                               | /                 | /                | /                | /              |
|                                      | <b>MSKKC Classification</b>                                                         |                                             |                   |                  |                  |                |                            |                   |                  |                  |                |                                                 |                   |                  |                  |                |
|                                      | Poor vs. Intermediate prognosis                                                     | 35                                          | 2                 | 0.91             | 0.044            | -0.113         | 15                         | 2                 | 0.888            | 0.29             | -0.21          | 15                                              | 2                 | 0.778            | 0.523            | -0.21          |
|                                      | Poor vs. Favorable prognosis                                                        | 26                                          | 2                 | 0.94             | 0.092            | -0.091         | 11                         | 2                 | 0.789            | 0.557            | 0.184          | 15                                              | 2                 | 0.883            | 0.423            | 0.181          |
| Intermediate vs. Favorable prognosis | 43                                                                                  | 2                                           | 0.91              | 0.045            | -0.162           | 24             | 2                          | 0.694             | 0.102            | -0.21            | 22             | 2                                               | 0.871             | 0.26             | 0.0153           |                |
| W2                                   | <b>Tumor Type</b>                                                                   | 55                                          | 2                 | 0.924            | 0.053            | -0.079         | 22                         | 2                 | 0.868            | 0.149            | -0.2           | /                                               | /                 | /                | /                | /              |
|                                      | <b>Grade Furhman (I &amp; II vs. III &amp; IV)</b>                                  | 42                                          | 2                 | 0.929            | 0.07             | -0.128         | 20                         | 2                 | 0.907            | 0.0923           | -0.21          | 22                                              | 2                 | 0.939            | 0.104            | -0.145         |
|                                      | <b>Interval bewteen diagnosis &amp; metastasis (≤ 12 months vs. &gt; 12 months)</b> | 55                                          | 2                 | 0.93             | 0.057            | -0.023         | 21                         | 2                 | 0.769            | 0.314            | -0.21          | 25                                              | 2                 | 0.891            | 0.224            | -0.0191        |
|                                      | <b>PS ( 0 or 1 vs. 2)</b>                                                           | 55                                          | 2                 | 0.9              | 0.041            | -0.045         | /                          | /                 | /                | /                | /              | /                                               | /                 | /                | /                |                |
|                                      | <b>MSKKC Classification</b>                                                         |                                             |                   |                  |                  |                |                            |                   |                  |                  |                |                                                 |                   |                  |                  |                |
|                                      | Poor vs. Intermediate prognosis                                                     | 35                                          | 2                 | 0.895            | 0.117            | -0.088         | 14                         | 2                 | 0.909            | 0.283            | -0.21          | 11                                              | 2                 | 0.96             | 0.319            | -0.0809        |
|                                      | Poor vs. Favorable prognosis                                                        | 22                                          | 2                 | 0.902            | 0.182            | -0.056         | 7                          | 2                 | 0.934            | 0.945            | 0.862          | 13                                              | 2                 | 0.955            | 0.241            | -0.107         |
| Intermediate vs. Favorable prognosis | 45                                                                                  | 2                                           | 0.934             | 0.18             | 0.049            | 19             | 2                          | 0.888             | 0.336            | 0.0722           | 18             | 2                                               | 0.925             | 0.149            | 0.119            |                |
| W5-6                                 | <b>Tumor Type</b>                                                                   | 49                                          | 2                 | 0.872            | 0.163            | -0.126         | 20                         | 2                 | 0.92             | 0.145            | -0.165         | /                                               | /                 | /                | /                | /              |
|                                      | <b>Grade Furhman (I &amp; II vs. III &amp; IV)</b>                                  | 40                                          | 2                 | 0.942            | 0.098            | -0.034         | 19                         | 2                 | 0.916            | 0.149            | -0.167         | 20                                              | 2                 | 0.945            | 0.151            | -0.166         |
|                                      | <b>Interval bewteen diagnosis &amp; metastasis (≤ 12 months vs. &gt; 12 months)</b> | 49                                          | 2                 | 0.859            | 0.158            | -0.207         | 20                         | 2                 | 0.92             | 0.198            | -0.147         | 22                                              | 2                 | 0.898            | 0.374            | -0.0651        |
|                                      | <b>PS ( 0 or 1 vs. 2)</b>                                                           | 49                                          | 2                 | 0.933            | 0.064            | -0.11          | /                          | /                 | /                | /                | /              | /                                               | /                 | /                | /                |                |
|                                      | <b>MSKKC Classification</b>                                                         |                                             |                   |                  |                  |                |                            |                   |                  |                  |                |                                                 |                   |                  |                  |                |
|                                      | Poor vs. Intermediate prognosis                                                     | 36                                          | 2                 | 0.871            | 0.149            | -0.075         | 9                          | 2                 | 0.947            | 0.367            | -0.145         | 10                                              | 2                 | 0.928            | 0.7              | 0.35           |
|                                      | Poor vs. Favorable prognosis                                                        | 20                                          | 2                 | 0.91             | 0.19             | -0.131         | 10                         | 2                 | 0.881            | 0.526            | -0.108         | 19                                              | 2                 | 0.945            | 0.235            | 0.0112         |
| Intermediate vs. Favorable prognosis | 38                                                                                  | 2                                           | 0.942             | 0.057            | -0.098           | 17             | 2                          | 0.842             | 0.247            | -0.21            | 15             | 2                                               | 0.94              | 0.353            | 0.0749           |                |



**Supplementary Table 3:** Goodness-of-fit model parameters for O-PLS models discriminating the experimental arm and the two standard therapies according to the collection time of serum samples (W0, W2 & W5-6).

| Collection Time | Model  | Sample Number | Orthogonal Component | R <sup>2</sup> X | R <sup>2</sup> Y | Q <sup>2</sup> | CV-ANOVA p-value |
|-----------------|--------|---------------|----------------------|------------------|------------------|----------------|------------------|
| W0              | A vs B | 82            | 1                    | 0.916            | 0.048            | -0.018         | 1                |
|                 | A vs C | 86            | 1                    | 0.791            | 0.078            | -0.145         | 1                |
|                 | B vs C | 56            | 1                    | 0.896            | 0.076            | 0.020          | 0.897            |
| W2              | A vs B | 77            | 2                    | 0.951            | 0.26             | 0.144          | 0.081            |
|                 | A vs C | 80            | 3                    | 0.959            | 0.35             | 0.186          | 0.056            |
|                 | B vs C | 47            | 1                    | 0.914            | 0.206            | 0.173          | 0.086            |
| W5-6            | A vs B | 69            | 2                    | 0.957            | 0.355            | 0.188          | 0.038            |
|                 | A vs C | 71            | 2                    | 0.956            | 0.28             | 0.128          | 0.171            |
|                 | B vs C | 42            | 2                    | 0.954            | 0.453            | 0.252          | 0.097            |

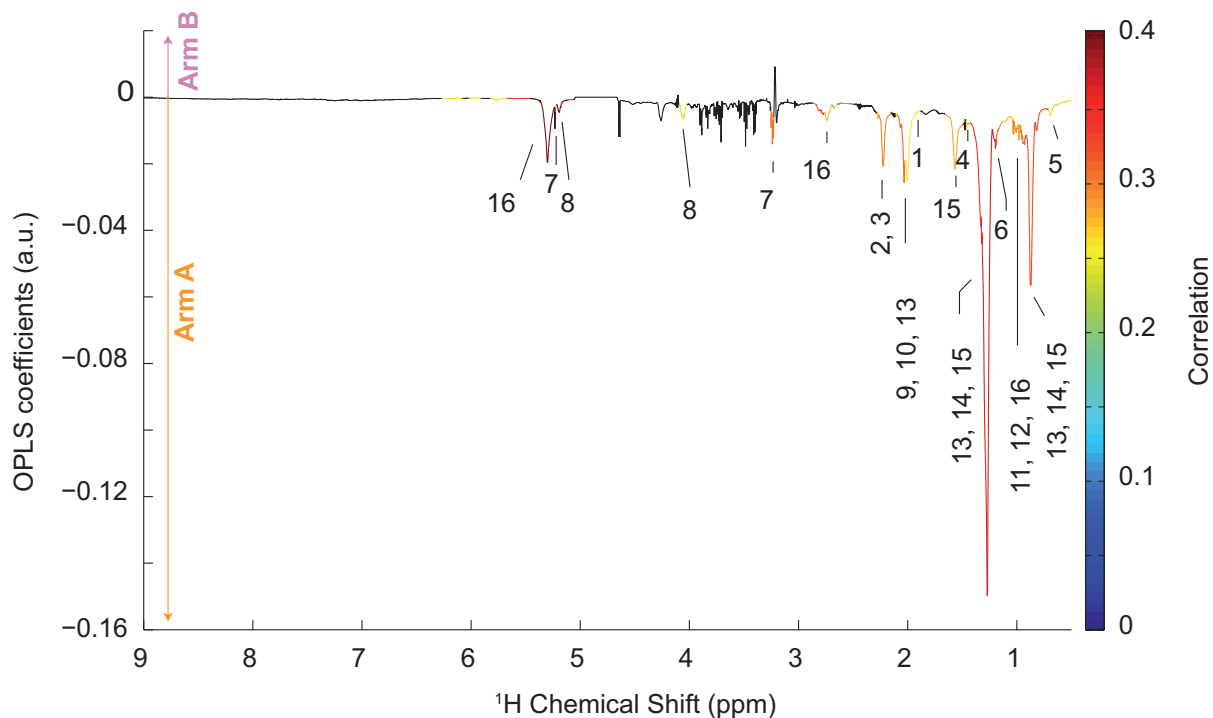

**Supplementary Figure 4:** O-PLS loadings plot after univariate analysis at W5-6 between arm A and B. Statistically significant signals correspond to coloured spectral regions. Highlighted candidate markers are: 1) Acetate, 2) Acetoacetate, 3) Acetone, 4) Alanine, 5) Cholesterol, 6) 3-hydroxybutyrate, 7) Glucose, 8) Glycerol backbone of PGLYs and TAGs, 9) N-acetylglycoprotein (NAC1), 10) NAC2, 11) Isoleucine, 12) Leucine, 13) Fatty acids (mainly LDL), 14) Fatty acids (mainly VLDL), 15) Fatty acids and 16) Valine. PGLY: Phosphoglycerides; TAGs: Triglycerides.
